# Supplementary material for: Collagen vitrigel promotes hepatocytic differentiation of induced pluripotent stem cells into functional hepatocyte-like cells
Source: PubMed Central journal article supplement (PMC6679405; doi:10.1242/bio.042192), 2019-06-10
Supplement: biolopen-8-042192-s1.pdf [file biolopen-8-042192-s1.pdf]

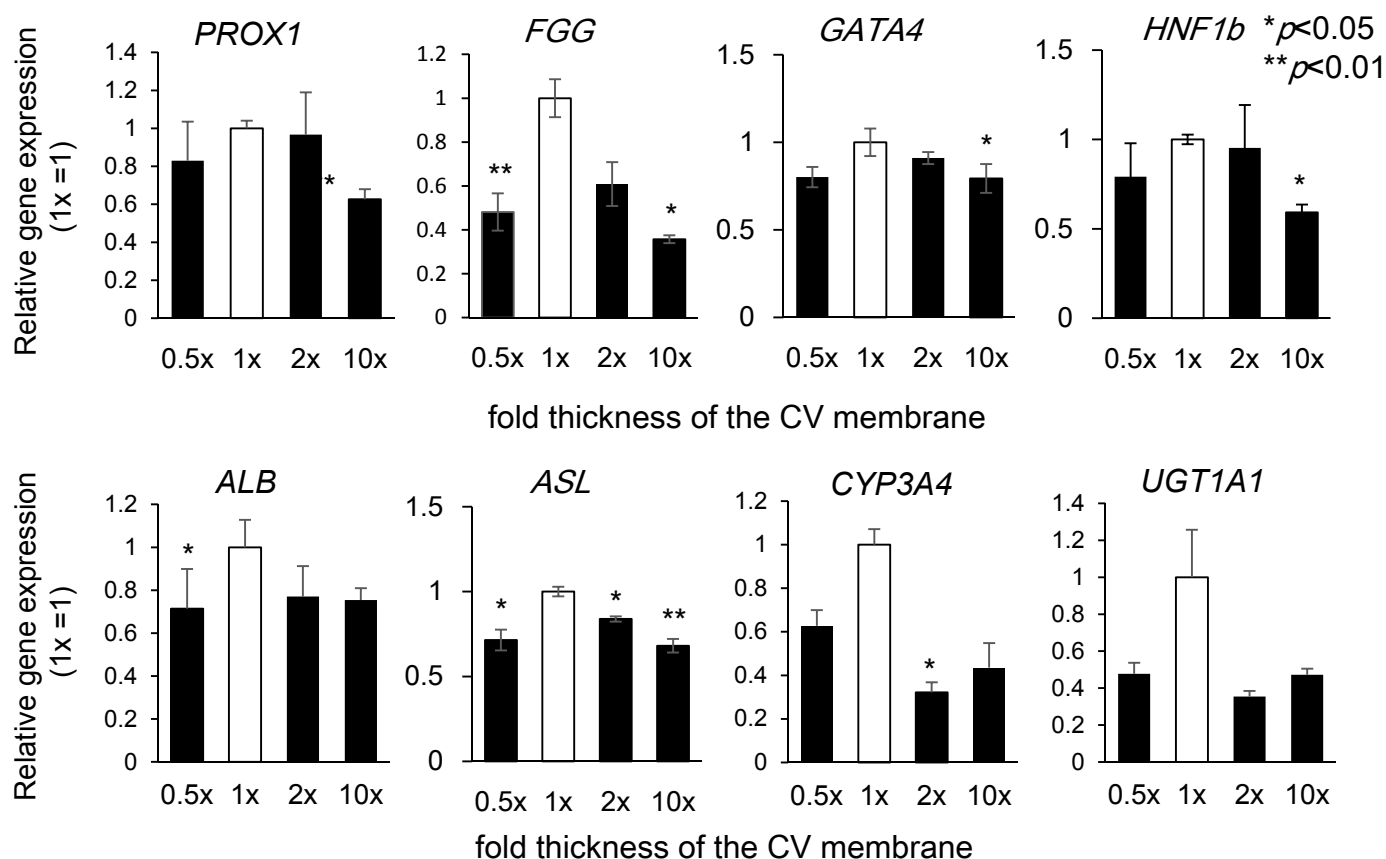

**Figure S1. Comparison among different thicknesses of the CV membrane used**

Human iPS cell-derived endoderm cells on day 3 were plated onto 0.5x, 1x, 2x, and 10x-fold thicknesses of CV membrane and cultured until day 32. Expression levels of various gene transcripts are quantified by real-time RT-PCR in the differentiated cells. Values represent means  $\pm$  S. D (n=3). Significance shown as \* $p$ <0.05 or \*\* $p$ <0.01, by two tailed Student's  $t$ -test, compared to those of hiPS-hep grown on 1x thickness of CV.

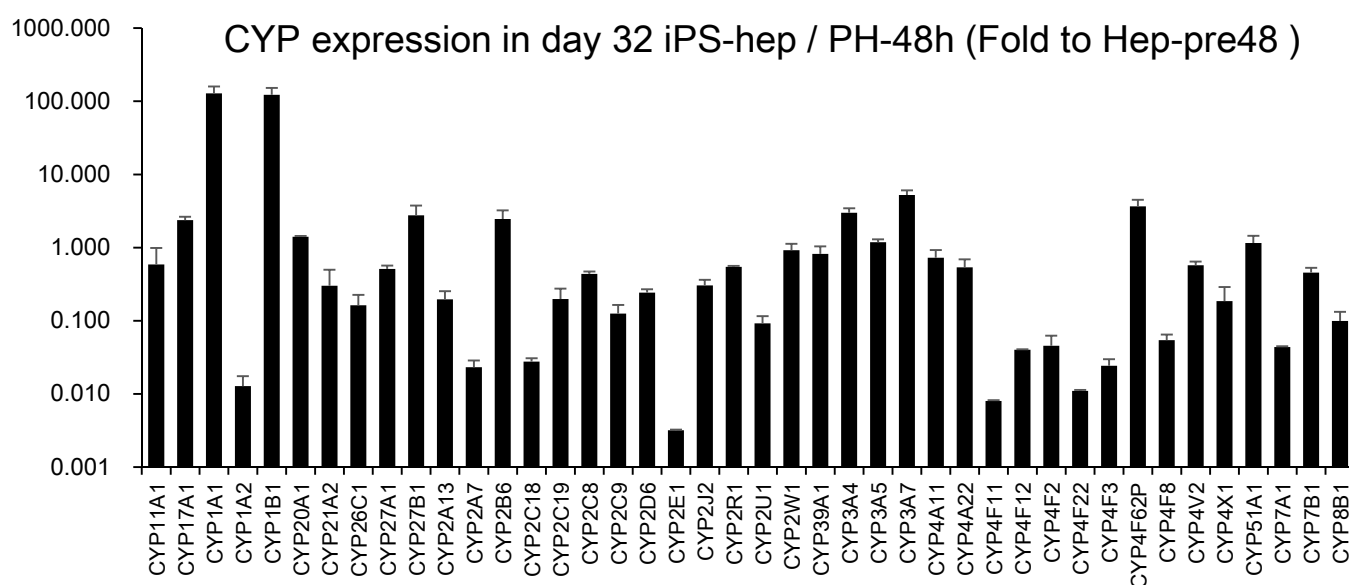

**Figure S2. CYP expression profiles revealed by gene array analysis of hiPS-hep on day 30 versus PH (pre-48h).**

CYP genes expressed in day 30 hiPS-hep are shown as fold changes to those expressed in PH (pre-48h). Values represent means  $\pm$  S. D (n=3).

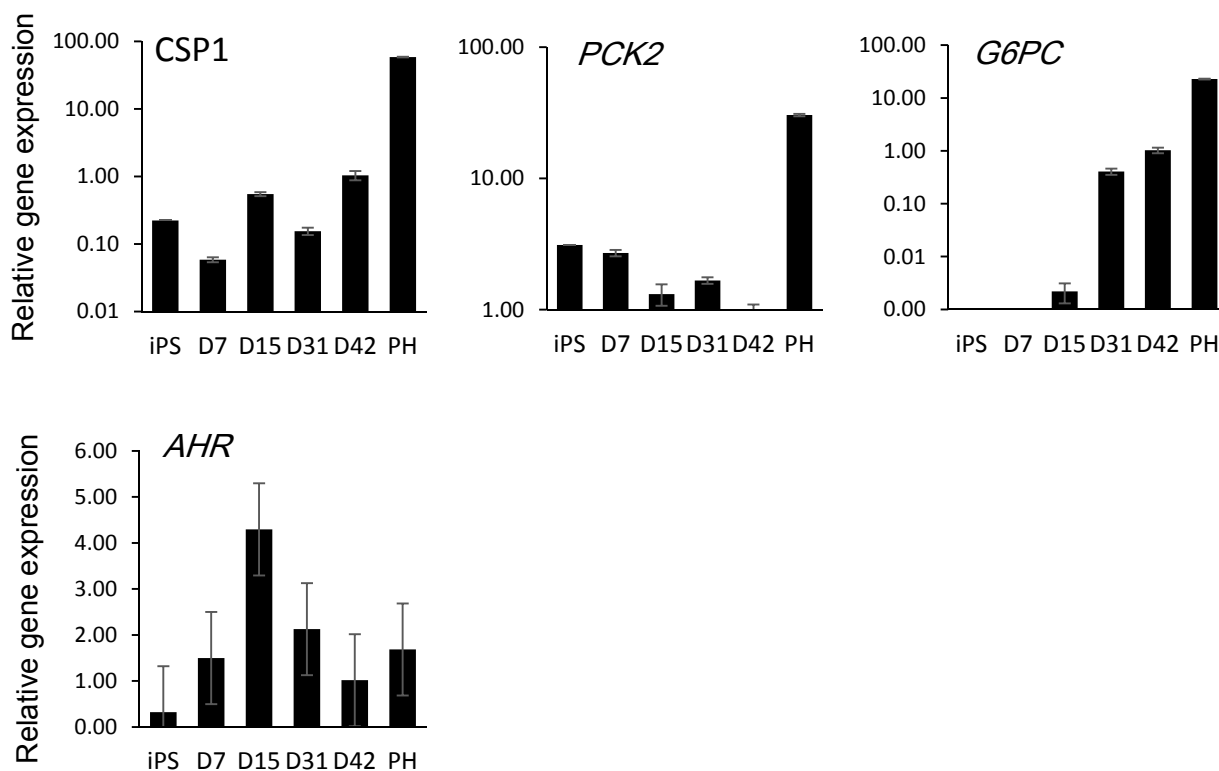

**Figure S3. Expression levels of the hepatocyte zone 1 (CPS1, PCK2, G6PC) and 3 (AHR) genes.**

Expression levels of various gene transcripts quantified by real-time RT-PCR in undifferentiated hiPS cells (iPS) or D7, D15, D31 or D42 differentiated hiPS cells on the CV membrane are compared with that of the primary hepatocytes (PH, 0h; no pre-culture). Values represent means  $\pm$  S. D (n=3).

Table S1. Primers list used in PrimerArray for detecting human hepatic differentiation

| Well ID | Symbol   | Gene         | Gene size | Position | Oligo dT | Random 6 mers | Exon Junction | Variants                                                                                                                                                                           | Variants cover ratio |
|---------|----------|--------------|-----------|----------|----------|---------------|---------------|------------------------------------------------------------------------------------------------------------------------------------------------------------------------------------|----------------------|
| 1       | NANOG    | NM 024865.2  | 2098      | 375      | NG       | OK            | 1/3           |                                                                                                                                                                                    | 1/1                  |
| 2       | POU5F1   | NM 002701.4  | 1411      | 508      | OK       | OK            | 2/4           |                                                                                                                                                                                    | 1/3                  |
| 3       | SOX2     | NM 003106.3  | 2520      | 1081     | OK       | OK            | 0/0           |                                                                                                                                                                                    | 1/1                  |
| 4       | CD9      | NM 001769    | 1321      | 238      | OK       | OK            | 1/7           |                                                                                                                                                                                    | 1/1                  |
| 5       | DNMT3B   | NM 0175948   | 2893      | 1257     | NG       | OK            | 1/21          | NM 006892.NM 175849.NM 175850.NM 001207055.NM 001207056                                                                                                                            | 6/6                  |
| 6       | GABRB3   | NM 000814    | 5783      | 677      | NG       | OK            | 1/8           | NM 021912.NM 001191320.NM 001191321                                                                                                                                                | 4/4                  |
| 7       | GAL      | NM 015973    | 778       | 350      | OK       | OK            | 1/5           |                                                                                                                                                                                    | 1/1                  |
| 8       | GDF3     | NM 020634    | 1224      | 337      | OK       | OK            | 1/1           |                                                                                                                                                                                    | 1/1                  |
| 9       | GRB7     | NM 005310    | 2285      | 1112     | OK       | OK            | 1/14          | NM 001030002.NM 001242442.NM 001242443                                                                                                                                             | 4/4                  |
| 10      | IFITM1   | NM 003641    | 733       | 423      | OK       | OK            | 1/1           |                                                                                                                                                                                    | 1/1                  |
| 11      | PODXL    | NM 005397    | 5911      | 1269     | NG       | OK            | 1/7           | NM 001018111                                                                                                                                                                       | 2/2                  |
| 12      | TDGF1    | NM 001174136 | 1784      | 428      | OK       | OK            | 1/5           | NM 003212                                                                                                                                                                          | 2/2                  |
| 13      | ZFP42    | NM 174900    | 2646      | 308      | NG       | OK            | 1/3           |                                                                                                                                                                                    | 1/1                  |
| 14      | SOX7     | NM 031439.2  | 3219      | 280      | NG       | OK            | 1/1           |                                                                                                                                                                                    | 1/1                  |
| 15      | LAMB1    | NM 002291.2  | 5866      | 4733     | OK       | OK            | 1/33          |                                                                                                                                                                                    | 1/1                  |
| 16      | HNF1B    | NM 004558.2  | 2842      | 1787     | OK       | OK            | 1/8           | NM 001165923                                                                                                                                                                       | 2/3                  |
| 17      | GSC      | NM 173849.2  | 1217      | 800      | OK       | OK            | 1/2           |                                                                                                                                                                                    | 1/1                  |
| 18      | NODAL    | NM 018055.4  | 2086      | 946      | OK       | OK            | 1/2           |                                                                                                                                                                                    | 1/1                  |
| 19      | FOXA2    | NM 021784.4  | 2428      | 286      | NG       | OK            | 1/1           | NM 153675                                                                                                                                                                          | 2/2                  |
| 20      | SOX17    | NM 022454.3  | 2350      | 1548     | OK       | OK            | 0/1           |                                                                                                                                                                                    | 1/1                  |
| 21      | CXCR4    | NM 001008540 | 1912      | 992      | OK       | OK            | 0/0           | NM 003467                                                                                                                                                                          | 2/2                  |
| 22      | GATA4    | NM 002052.3  | 3419      | 1542     | NG       | OK            | 1/6           |                                                                                                                                                                                    | 1/1                  |
| 23      | GATA6    | NM 005257.4  | 3770      | 1890     | NG       | OK            | 1/6           |                                                                                                                                                                                    | 1/1                  |
| 24      | AFP      | NM 001134.1  | 2032      | 332      | NG       | OK            | 1/14          |                                                                                                                                                                                    | 1/1                  |
| 25      | CYP3A7   | NM 000765    | 2095      | 987      | OK       | OK            | 2/12          |                                                                                                                                                                                    | 1/1                  |
| 26      | DLK1     | NM 003336.5  | 1599      | 316      | OK       | OK            | 2/4           |                                                                                                                                                                                    | 1/2                  |
| 27      | PROX1    | NM 002763.3  | 3088      | 228      | OK       | OK            | 1/4           |                                                                                                                                                                                    | 1/1                  |
| 28      | TBX3     | NM 005996.3  | 4754      | 1887     | NG       | OK            | 1/6           | NM 016569                                                                                                                                                                          | 2/2                  |
| 29      | SERPINA1 | NM 000295.4  | 3220      | 1850     | OK       | OK            | 0/4           | NM 001002235.NM 001002236.NM 001127700.NM 001127701.NM 001127702.NM 001127703.NM 001127704.NM 001127705.NM 001127706.NM 001127707                                                  | 11/11                |
| 30      | AHSG     | NM 001622.2  | 1594      | 269      | OK       | OK            | 1/6           |                                                                                                                                                                                    | 1/1                  |
| 31      | ALB      | NM 000477.5  | 2264      | 310      | NG       | OK            | 1/14          |                                                                                                                                                                                    | 1/1                  |
| 32      | APOA4    | NM 000482.3  | 1460      | 258      | OK       | OK            | 1/2           |                                                                                                                                                                                    | 1/1                  |
| 33      | ASGR1    | NM 001671.4  | 1519      | 394      | OK       | OK            | 1/8           | NM 001197216                                                                                                                                                                       | 2/2                  |
| 34      | KRT8     | NM 001256282 | 1807      | 73       | NG       | OK            | 1/8           |                                                                                                                                                                                    | 1/4                  |
| 35      | KRT18    | NM 000224.2  | 1485      | 1259     | OK       | OK            | 1/6           | NM 199187                                                                                                                                                                          | 2/2                  |
| 36      | FABP1    | NM 001443.2  | 598       | 441      | OK       | OK            | 1/3           |                                                                                                                                                                                    | 1/1                  |
| 37      | FCG      | NM 000509.4  | 1865      | 1275     | OK       | OK            | 1/9           | NM 021870                                                                                                                                                                          | 2/2                  |
| 38      | G6PC     | NM 00151.2   | 1096      | 324      | OK       | OK            | 1/4           |                                                                                                                                                                                    | 1/1                  |
| 39      | PCK2     | NM 004563.2  | 2221      | 413      | NG       | OK            | 1/9           | NM 001018073                                                                                                                                                                       | 2/2                  |
| 40      | RBPA     | NM 006744.3  | 941       | 442      | OK       | OK            | 1/5           |                                                                                                                                                                                    | 1/1                  |
| 41      | TAT      | NM 000353.2  | 2757      | 1381     | OK       | OK            | 1/11          |                                                                                                                                                                                    | 1/1                  |
| 42      | TF       | NM 001063.3  | 2808      | 2009     | OK       | OK            | 1/16          |                                                                                                                                                                                    | 1/1                  |
| 43      | TD02     | NM 005651.3  | 1703      | 494      | OK       | OK            | 1/11          |                                                                                                                                                                                    | 1/1                  |
| 44      | HHEX     | NM 002729.4  | 1772      | 675      | OK       | OK            | 1/3           |                                                                                                                                                                                    | 1/1                  |
| 45      | HNF1A    | NM 000545.5  | 3241      | 2917     | OK       | OK            | 0/9           |                                                                                                                                                                                    | 1/1                  |
| 46      | HNF4A    | NM 178849.2  | 4707      | 905      | NG       | OK            | 1/9           | NM 001030003.NM 001030004.NM 175914.NM 000457.NM 178850.NM 001258355                                                                                                               | 7/7                  |
| 47      | AHR      | NM 001621.4  | 6247      | 1479     | NG       | OK            | 1/10          |                                                                                                                                                                                    | 1/1                  |
| 48      | NR13     | NM_001077473 | 1120      | 607      | OK       | OK            | 1/7           | NM 001077480.NM 001077481.NM 001077482.NM 001077474.NM 001077475.NM 001077476.NM 001077477.NM 001077478.NM 001077479.NM 001077469.NM 005122.NM 001077470.NM 001077471.NM 001077472 | 15/15                |
| 49      | NR12     | NM 003889.3  | 4446      | 2680     | NG       | OK            | 1/8           | NM 033013.NM 022020                                                                                                                                                                | 3/3                  |
| 50      | NR1H3    | NM 003693.3  | 1939      | 1250     | OK       | OK            | 1/9           | NM 001130107.NM 001130102.NM 001251934.NM 001251935                                                                                                                                | 5/5                  |
| 51      | NR1H4    | NM 001206979 | 2325      | 1412     | OK       | OK            | 1/10          | NM 001206977.NM 001206978.NM 005123.NM 001206993.NM 001206992                                                                                                                      | 6/6                  |
| 52      | RXRRA    | NM 002957.4  | 5547      | 180      | NG       | OK            | 1/9           |                                                                                                                                                                                    | 1/1                  |
| 53      | NR3C1    | NM_001204259 | 6801      | 2026     | NG       | OK            | 1/8           | NM 001024094.NM 001204258.NM 001204260.NM 001204261.NM 001204262.NM 001204263.NM 001204264.NM 001204265.NM 000176.NM 001018074.NM 001018075.NM 001018076.NM 001018077.NM 001020825 | 15/15                |
| 54      | PPARA    | NM 001001928 | 9965      | 552      | NG       | OK            | 1/7           | NM 005036                                                                                                                                                                          | 2/2                  |
| 55      | CYP1A1   | NM 000499    | 2608      | 1971     | OK       | OK            | 0/6           |                                                                                                                                                                                    | 1/1                  |
| 56      | CYP1A2   | NM 000761    | 3127      | 969      | NG       | OK            | 0/6           |                                                                                                                                                                                    | 1/1                  |
| 57      | CYP2A6   | NM 000762    | 1775      | 1212     | OK       | OK            | 1/8           |                                                                                                                                                                                    | 1/1                  |
| 58      | CYP2C8   | NM 000770    | 1924      | 1389     | OK       | OK            | 1/8           | NM 001198853.NM 001198854.NM 001198855                                                                                                                                             | 4/5                  |
| 59      | CYP2E1   | NM 000773    | 1667      | 1026     | OK       | OK            | 1/8           |                                                                                                                                                                                    | 1/1                  |
| 60      | CYP2D6   | NM 000106    | 1673      | 1419     | OK       | OK            | 1/8           | NM 001025161                                                                                                                                                                       | 2/2                  |
| 61      | CYP3A4   | NM 017460    | 2792      | 1596     | OK       | OK            | 1/12          | NM 001202855                                                                                                                                                                       | 2/4                  |
| 62      | CYP7A1   | NM 000780    | 2875      | 235      | NG       | OK            | 1/5           |                                                                                                                                                                                    | 1/1                  |
| 63      | ABCB4    | NM 000443.3  | 8687      | 2627     | OK       | OK            | 1/27          | NM 018850.NM 018849                                                                                                                                                                | 3/3                  |
| 64      | ABCC1    | NM 004996.3  | 6584      | 1681     | NG       | OK            | 1/30          |                                                                                                                                                                                    | 1/1                  |
| 65      | ABCC3    | NM 003786.3  | 5183      | 1530     | NG       | OK            | 1/30          | NM 001144070                                                                                                                                                                       | 2/4                  |
| 66      | ABCC2    | NM 004827.2  | 4445      | 1394     | NG       | OK            | 2/15          | NM 001257386                                                                                                                                                                       | 2/2                  |
| 67      | SLC10A1  | NM 003049.3  | 1631      | 524      | OK       | OK            | 1/4           |                                                                                                                                                                                    | 1/1                  |
| 68      | SLC22A1  | NM 003057.2  | 1921      | 790      | OK       | OK            | 1/10          | NM 153187                                                                                                                                                                          | 1/1                  |
| 69      | SLC22A2  | NM 003058.3  | 2512      | 1464     | OK       | OK            | 1/10          |                                                                                                                                                                                    | 2/2                  |
| 70      | SLCO1B1  | NM 006446.4  | 2800      | 1577     | OK       | OK            | 1/14          |                                                                                                                                                                                    | 1/1                  |
| 71      | SLCO1B3  | NM 019844.3  | 3014      | 2007     | OK       | OK            | 1/15          |                                                                                                                                                                                    | 1/1                  |
| 72      | SLCO2B1  | NM 007256.4  | 4362      | 3036     | OK       | OK            | 0/13          | NM 001145211.NM 001145212                                                                                                                                                          | 3/3                  |
| 73      | UGT1A1   | NM 000463.2  | 2357      | 430      | NG       | OK            | 0/4           |                                                                                                                                                                                    | 1/1                  |
| 74      | GSTA2    | NM 000846.4  | 1320      | 432      | OK       | OK            | 1/6           |                                                                                                                                                                                    | 1/1                  |
| 75      | ATP5G1   | NM_005175.2  | 663       | 455      | OK       | OK            | 1/4           | NM_001002027                                                                                                                                                                       | 2/2                  |
| 76      | POLG     | NM 002693.2  | 4464      | 3732     | OK       | OK            | 1/22          | NM 001126131                                                                                                                                                                       | 2/2                  |
| 77      | PPARGCIA | NM 013281.3  | 6318      | 521      | NG       | OK            | 1/12          |                                                                                                                                                                                    | 1/1                  |
| 78      | UCP2     | NM 003355.2  | 1646      | 1209     | OK       | OK            | 1/7           |                                                                                                                                                                                    | 1/1                  |
| 79      | ARG1     | NM 001244438 | 1499      | 663      | OK       | OK            | 1/7           | NM 000045                                                                                                                                                                          | 2/2                  |
| 80      | ASL      | NM 001024943 | 2061      | 1295     | OK       | OK            | 1/15          | NM 000048.NM 001024944.NM 001024946                                                                                                                                                | 4/4                  |
| 81      | ASS1     | NM 000050.4  | 1863      | 1356     | OK       | OK            | 1/15          | NM 054012                                                                                                                                                                          | 2/2                  |
| 82      | CPS1     | NM 001122633 | 5738      | 4340     | OK       | OK            | 1/38          | NM 001875.NM 001122634                                                                                                                                                             | 3/3                  |
| 83      | NAGS     | NM 153006.2  | 2086      | 1459     | OK       | OK            | 1/6           |                                                                                                                                                                                    | 1/1                  |
| 84      | OTC      | NM 000531.5  | 1647      | 67       | NG       | OK            | 0/9           |                                                                                                                                                                                    | 1/1                  |
| 85      | KRT19    | NM 002276.4  | 1490      | 840      | OK       | OK            | 1/5           |                                                                                                                                                                                    | 1/1                  |
| 86      | KRT7     | NM 003556.3  | 1753      | 1008     | OK       | OK            | 1/8           |                                                                                                                                                                                    | 1/1                  |
| 87      | AQP1     | NM 19398.2   | 2807      | 773      | NG       | OK            | 1/3           | NM 001185060.NM 001185061.NM 001185062                                                                                                                                             | 3/3                  |
| 88      | HES1     | NM 005524.3  | 1475      | 618      | OK       | OK            | 1/17          |                                                                                                                                                                                    | 1/1                  |
| 89      | GUSB     | NM 000181    | 2321      | 1773     | OK       | OK            | 1/11          |                                                                                                                                                                                    | 1/1                  |
| 90      | HPRT1    | NM 000194    | 1435      | 684      | OK       | OK            | 2/8           |                                                                                                                                                                                    | 1/1                  |
| 91      | PGK1     | NM 000291    | 2439      | 1086     | OK       | OK            | 1/10          |                                                                                                                                                                                    | 1/1                  |
| 92      | ACTB     | NM 001101.3  | 1852      | 1135     | OK       | OK            | 1/5           |                                                                                                                                                                                    | 1/1                  |
| 93      | GAPDH    | NM 002046.4  | 1401      | 415      | OK       | OK            | 1/8           | NM 001256799                                                                                                                                                                       | 2/2                  |
| 94      | TBP      | NM 003194    | 1921      | 954      | OK       | OK            | 1/7           | NM 001172085                                                                                                                                                                       | 2/2                  |
| 95      | B2M      | NM 004048    | 987       | 122      | OK       | OK            | 1/3           |                                                                                                                                                                                    | 1/1                  |
| 96      | PP1A     | NM 021130    | 2276      | 522      | NG       | OK            | 1/4           |                                                                                                                                                                                    | 1/3                  |

**Table S2. Top 10 gene categories of the up- or down-regulated genes in hiPS-hep compared to undifferentiated iPSCs**

| up-regulated gene in hiPS-hep              |                 |
|--------------------------------------------|-----------------|
| Category                                   | <i>P</i> -value |
| Lipid Metabolism                           | 1.3E-28         |
| Metabolic Disease                          | 6.53E-23        |
| Vitamin and Mineral Metabolism             | 6.53E-23        |
| Inflammatory Response                      | 6.53E-23        |
| Gastrointestinal Disease                   | 8.32E-19        |
| Cellular Movement                          | 3.15E-17        |
| Digestive System Development and Function  | 4.37E-16        |
| Cell Death and Survival                    | 2.27E-14        |
| Carbohydrate Metabolism                    | 1.03E-13        |
| Protein Synthesis                          | 1.49E-13        |
| down-regulated gene in hiPS-hep            |                 |
| Category                                   | <i>P</i> -value |
| Cancer                                     | 1.02E-19        |
| Cellular Development                       | 1.42E-13        |
| Cell Cycle                                 | 1.45E-13        |
| Cellular Assembly and Organization         | 7.72E-12        |
| DNA Replication, Recombination, and Repair | 6.38E-11        |
| Cell Morphology                            | 2.29E-10        |
| Tissue Development                         | 8.23E-10        |
| Cell-To-Cell Signaling and Interaction     | 9.23E-10        |
| Cellular Function and Maintenance          | 3.26E-09        |
| Organismal Survival                        | 9.43E-09        |

**Table S3. Top 100 up-regulated genes in hiPS-hep compared to undifferentiated hiPSCs**

| Gene Name                                            | Fold Change | Gene Name                                       | Fold Change |
|------------------------------------------------------|-------------|-------------------------------------------------|-------------|
| albumin                                              | 17.8        | tryptophan 2,3-dioxygenase                      | 12          |
| haptoglobin-related protein                          | 16.7        | cytochrome P450 family 3 subfamily A member 5   | 11.9        |
| aldolase, fructose-bisphosphate B                    | 16.2        | annexin A8 like 1                               | 11.9        |
| apolipoprotein H                                     | 15.8        | arylacetamide deacetylase                       | 11.8        |
| apolipoprotein C3                                    | 15.8        | fibrinogen beta chain                           | 11.8        |
| serum amyloid A1                                     | 15.6        | glutathione S-transferase alpha 2               | 11.8        |
| haptoglobin                                          | 15.5        | ubiquitin D                                     | 11.8        |
| fibrinogen like 1                                    | 14.7        | alpha-2-macroglobulin                           | 11.7        |
| serpin family A member 3                             | 14.7        | vanin 1                                         | 11.7        |
| transmembrane 4 L six family member 4                | 14.2        | inter-alpha-trypsin inhibitor heavy chain 1     | 11.7        |
| apolipoprotein C2                                    | 14.1        | complement factor H                             | 11.7        |
| defensin beta 1                                      | 14          | arginase 1                                      | 11.7        |
| inter-alpha-trypsin inhibitor heavy chain 3          | 13.9        | N-acetyltransferase 8 (putative)                | 11.6        |
| serum amyloid A4, constitutive                       | 13.9        | hydroxyacid oxidase 1                           | 11.6        |
| serum amyloid A2                                     | 13.9        | UDP glucuronosyltransferase family 1 member A10 | 11.5        |
| aldo-keto reductase family 1 member B10              | 13.6        | aldo-keto reductase family 1 member C2          | 11.5        |
| nicotinamide N-methyltransferase                     | 13.6        | histidine rich glycoprotein                     | 11.5        |
| serpin family A member 1                             | 13.5        | coagulation factor II, thrombin                 | 11.5        |
| alcohol dehydrogenase 1C (class I), gamma polypeptid | 13.2        | HNF1 homeobox A                                 | 11.4        |
| galectin 4                                           | 13.2        | hydroxysteroid 17-beta dehydrogenase 2          | 11.4        |
| transmembrane 4 L six family member 5                | 13          | orosomuroid 1                                   | 11.4        |
| serpin family C member 1                             | 13          | complement component 4 binding protein beta     | 11.4        |
| hydroxysteroid 11-beta dehydrogenase 1               | 12.8        | alpha 2-HS glycoprotein                         | 11.4        |
| retinol binding protein 4                            | 12.7        | complement factor I                             | 11.3        |
| carboxylesterase 1                                   | 12.7        | caspase 1                                       | 11.3        |
| cytochrome P450 family 8 subfamily B member 1        | 12.6        | fibrinogen alpha chain                          | 11.3        |
| GC, vitamin D binding protein                        | 12.6        | vitronectin                                     | 11.3        |
| fatty acid binding protein 1                         | 12.5        | sulfotransferase family 2A member 1             | 11.3        |
| angiotensinogen                                      | 12.5        | solute carrier family 40 member 1               | 11.2        |
| aldo-keto reductase family 1 member B15              | 12.5        | apolipoprotein B                                | 11.2        |
| acyl-CoA synthetase medium chain family member 2E    | 12.5        | aldehyde dehydrogenase 1 family member A1       | 11.2        |
| UDP glucuronosyltransferase family 2 member B7       | 12.4        | flavin containing monooxygenase 3               | 11.2        |
| apolipoprotein A1                                    | 12.4        | complement component 4 binding protein alpha    | 11.1        |
| cytochrome P450 family 2 subfamily C member 9        | 12.4        | hyaluronan binding protein 2                    | 11          |
| cytochrome P450 family 2 subfamily C member 18       | 12.3        | baculoviral IAP repeat containing 3             | 10.9        |
| cytochrome P450 family 3 subfamily A member 7        | 12.3        | complement C8 alpha chain                       | 10.9        |
| UDP glucuronosyltransferase family 2 member B4       | 12.3        | orosomuroid 2                                   | 10.8        |
| aldo-keto reductase family 1 member C4               | 12.2        | APOBEC1 complementation factor                  | 10.8        |
| UDP glucuronosyltransferase family 2 member B10      | 12.2        | secretory leukocyte peptidase inhibitor         | 10.7        |
| asialoglycoprotein receptor 2                        | 12.2        | lipopolysaccharide binding protein              | 10.7        |
| fibrinogen gamma chain                               | 12.2        | transmembrane 4 L six family member 1           | 10.7        |
| inter-alpha-trypsin inhibitor heavy chain 2          | 12.2        | UDP glucuronosyltransferase family 2 member B15 | 10.7        |
| glutathione S-transferase alpha 5                    | 12.2        | serpin family A member 4                        | 10.6        |
| transferrin                                          | 12.2        | cadherin related family member 2                | 10.6        |
| bile acid-CoA:amino acid N-acyltransferase           | 12.1        | acyl-CoA synthetase long chain family member 5  | 10.6        |
| 4-hydroxyphenylpyruvate dioxygenase                  | 12.1        | transthyretin                                   | 10.6        |
| UDP glucuronosyltransferase family 1 member A6       | 12.1        | PDZK1 interacting protein 1                     | 10.5        |
| amyloid P component, serum                           | 12.1        | cytochrome P450 family 4 subfamily A member 11  | 10.5        |
| plasminogen                                          | 12.1        | ATP binding cassette subfamily C member 3       | 10.5        |
| UDP glucuronosyltransferase family 2 member B11      | 12.1        | hepcidin antimicrobial peptide                  | 10.5        |
